# Supplementary material for: Chiral self-assembly of fullerene clusters on CT-DNA templates
Source: Royal Society of Chemistry journal article supplement (doi:10.1039/c7fd00196g), 2017-10-05
Supplement: c7fd00196g1.pdf [file c7fd00196g1.pdf]

## Supporting Information

### Chiral self-assembly of fullerene clusters on CT-DNA templates

Sandeepa K. V.<sup>a</sup> and Joshy Joseph<sup>\*a</sup>

<sup>a</sup> Photosciences and Photonics Section, Chemical Sciences and Technology Division, CSIR-National Institute for Interdisciplinary Science and Technology, Thiruvananthapuram 695019, Kerala, India and Academy of Scientific and Innovative Research (AcSIR), CSIR-NIIST Campus, Thiruvananthapuram 695019, Kerala, India.

E-mail: joshya@gmail.com; [joshy@niist.res.in](mailto:joshy@niist.res.in).

| Sl. No. | Contents                                                                                                                                                                   | Page No |
|---------|----------------------------------------------------------------------------------------------------------------------------------------------------------------------------|---------|
| 1.      | Figure S1 shows TEM image of <b>F-An</b> nanoclusters                                                                                                                      | 1       |
| 2.      | Figure S2 shows absorption changes at 260 nm in the presence and absence of <b>F-An</b> with increasing concentration of [CT-DNA].                                         | 1       |
| 3.      | Figure S3 shows saturation plot and corresponding half reciprocal plot of <b>F-An</b> (3 $\mu$ M) with increase in [CT-DNA]                                                | 2       |
| 4.      | Figure S4 shows changes in the absorption and emission spectra of ethidium bromide (30 $\mu$ M) in the presence of CT-DNA.                                                 | 2       |
| 5.      | Figure S5 shows the changes in the absorption and emission spectra of CT-DNA/ethidium bromide complex in the presence of <b>F-An</b>                                       | 3       |
| 6.      | Figure S6 shows circular dichroism spectra of <b>F-Py</b> , <b>F-An</b> , <b>F-PTz</b> , CT-DNA/ <b>F-Py</b> and CT-DNA/ <b>F-PTz</b>                                      | 3       |
| 7.      | Figure S7 shows temperature dependent CD spectral profile of CT-DNA/ <b>F-An</b>                                                                                           | 4       |
| 8.      | Figure S8 shows AFM height image of CT-DNA/ <b>F-An</b> and <b>F-PTz</b> alone                                                                                             | 4       |
| 9.      | Figure S9 shows EDAX measured over nanonetwork from dsDNA/ <b>F-An</b> (1:1) showing corresponding peaks arising from the phosphorous and oxygen atoms of CT-DNA backbone. | 4       |

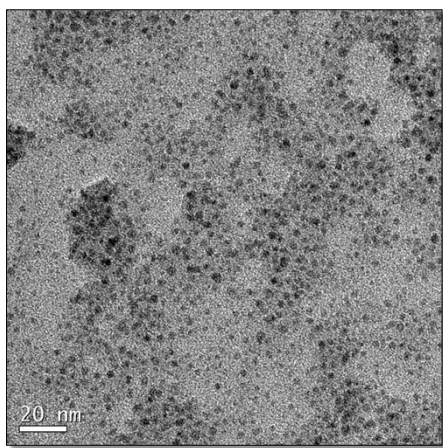

**Figure S1.** TEM image of **F-An** nanoclusters in 10% DMSO-PBS showing more or less uniform, 3-5 nm sized spherical nanoclusters.

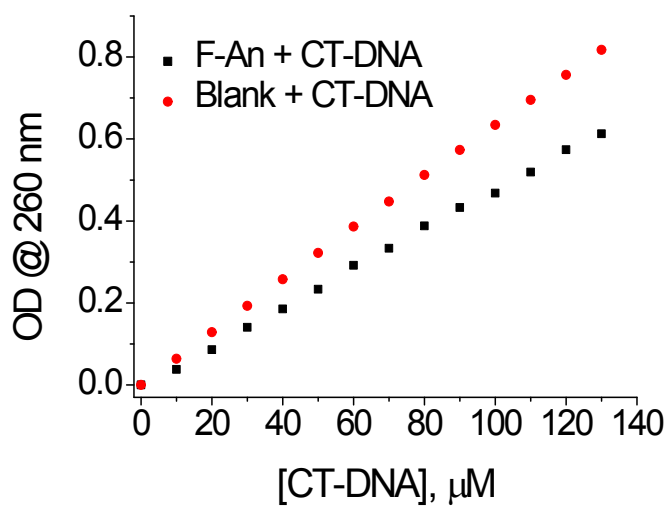

**Figure S2.** Absorption changes at 260 nm in the presence and absence of **F-An** with increasing concentration of [CT-DNA]. CT-DNA was added in small aliquots to a 10% DMSO-PBS solution of **F-An** nanoclusters or to a 10% DMSO-PBS solution blank.

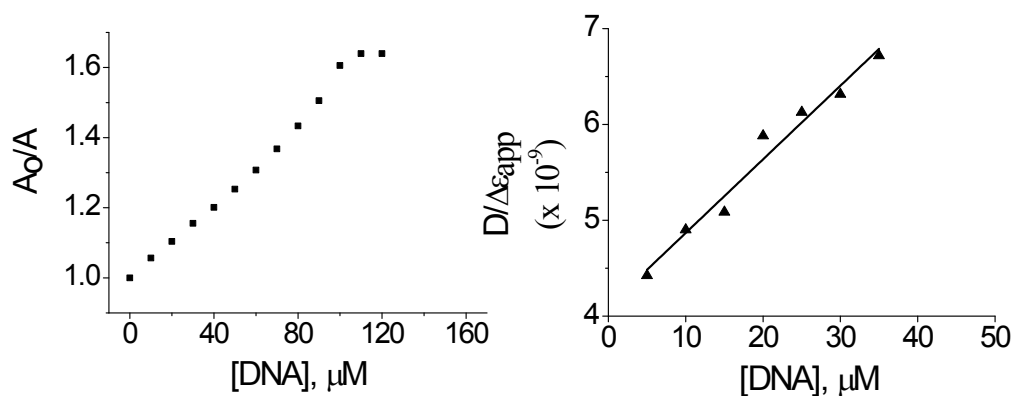

**Figure S3.** a) Saturation plot of absorption changes at 336 nm upon addition of CT-DNA to **F-An** (3  $\mu M$ ) and b) corresponding half reciprocal plot with increase in  $[CT-DNA]$ .

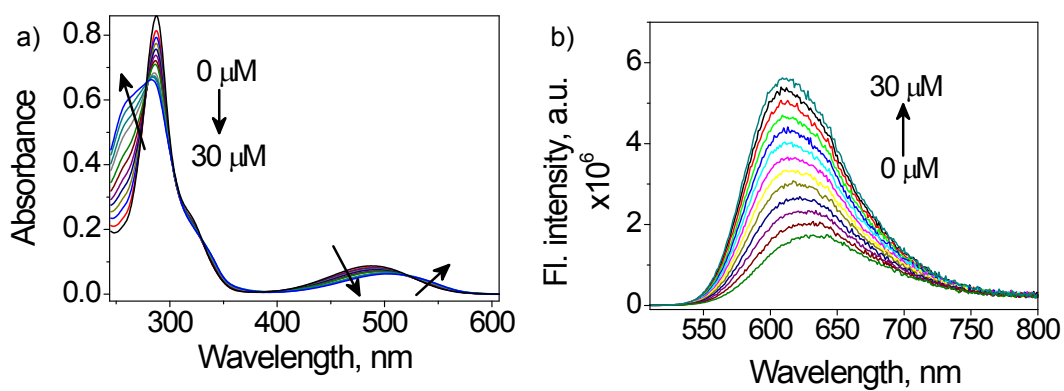

**Figure S4.** Changes in the a) absorption spectra and b) emission spectra of ethidium bromide (30  $\mu M$ ) in the presence of increasing concentrations of CT-DNA.

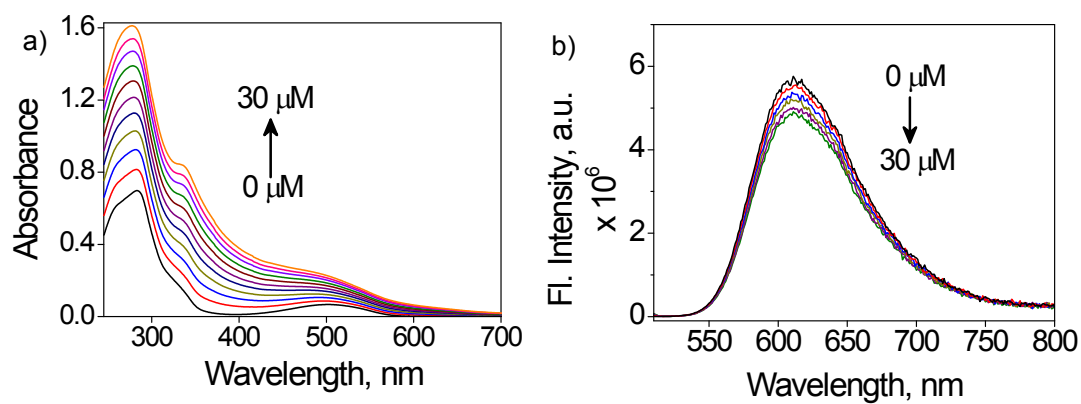

**Figure S5.** Changes in the a) absorption spectra and b) emission spectra of CT-DNA/ethidium bromide complex (30 μM/ 30 μM, 1:1) in the presence of increasing concentrations of **F-An**.

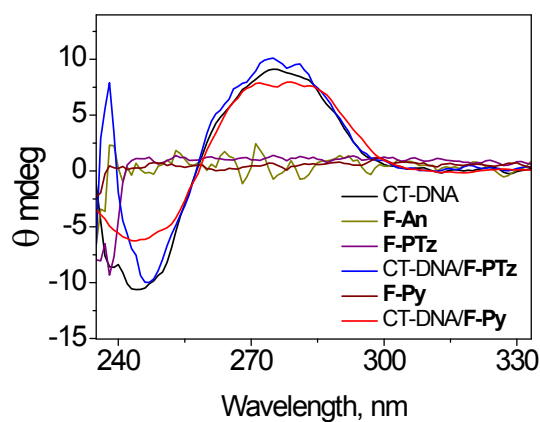

**Figure S6.** Circular dichroism spectra of **F-Py**, **F-An**, **F-PTz**, CT-DNA/**F-Py** (1:1) and CT-DNA/**F-PTz** (1:1) in 10% DMSO-PBS. These control experiments confirm that only **F-An** with unique cluster size can undergo templated self-assembly with CT-DNA.

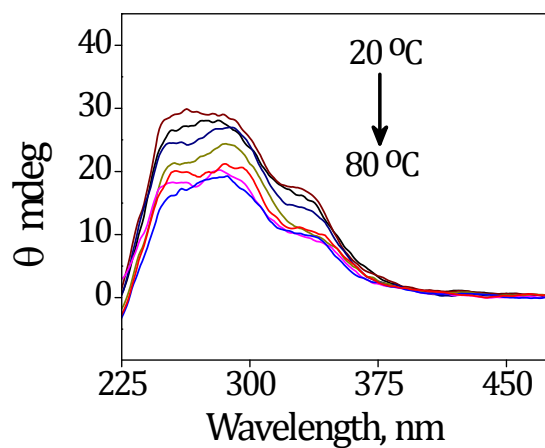

**Figure S7.** Temperature dependent CD spectral profile of CT-DNA/F-An (1:1) from 20 °C to 80 °C.

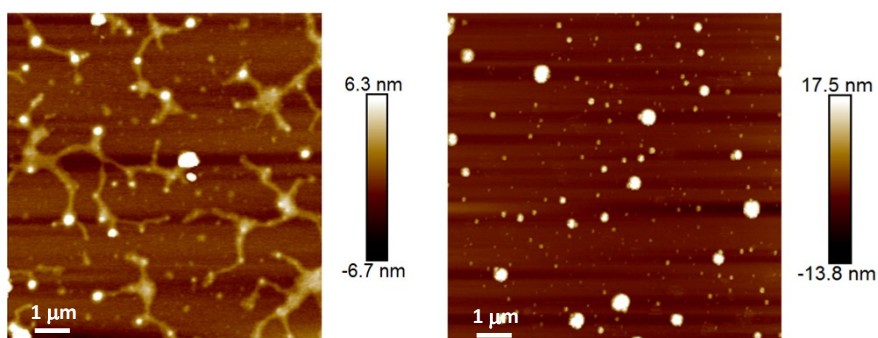

**Figure S8.** AFM height image of a) CT-DNA/F-An and b) F-PTz alone.

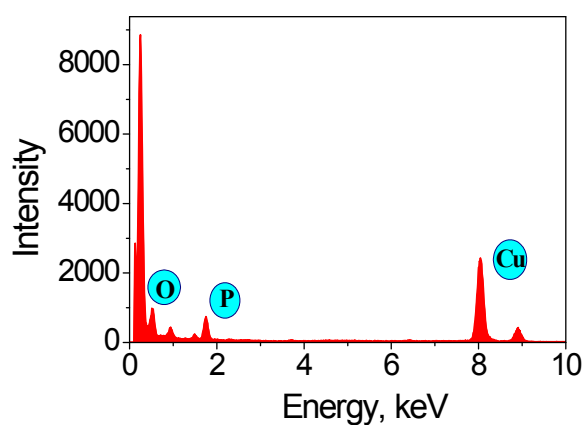

**Figure S9.** EDAX measured over nanonetwork from dsDNA/F-An (1:1) showing corresponding peaks arising from the phosphorous and oxygen atoms of CT-DNA backbone.
